# Supplementary material for: Computational design of polymers: poly(ester amide) and polyurethane
Source: Royal Society of Chemistry journal article supplement (doi:10.1039/c7ra05395a), 2017-01-01
Supplement: c7ra05395a1.pdf [file c7ra05395a1.pdf]

Electronic Supplementary Information

**Computational design of polymers:  
poly(ester amide) and polyurethane**

Yuichiro Fukuda, Kohei Miyamae and Yuji Sasanuma\*

*Department of Applied Chemistry and Biotechnology,  
Graduate School and Faculty of Engineering, Chiba University  
1-33 Yayoi-cho, Inage-ku, Chiba 263-8522, Japan*

**Table S1** Stable conformations, intramolecular interactions, and effectual MO theories found for various functional units and characteristic ratios of the corresponding polymers

| Polymer type                   | Included element | Corresponding polymer                                                                                                                                                                                                             | Functional unit                                                                           | Stable conformation                                                                                         | Intramolecular interaction <sup>a</sup>                                  | Characteristic ratio ( $\langle r^2 \rangle_0 / \langle r^2 \rangle_b$ ) <sup>b</sup> | Effectual MO theory <sup>c</sup> | Reference no. |  |
|--------------------------------|------------------|-----------------------------------------------------------------------------------------------------------------------------------------------------------------------------------------------------------------------------------|-------------------------------------------------------------------------------------------|-------------------------------------------------------------------------------------------------------------|--------------------------------------------------------------------------|---------------------------------------------------------------------------------------|----------------------------------|---------------|--|
| Polyether                      | C, H, O          | poly(methylene oxide)<br>poly(ethylene oxide)<br>poly(trimethylene oxide)<br>poly(propylene oxide)<br>poly(tetramethylene oxide)                                                                                                  | [O-CH <sub>2</sub> -]                                                                     | gg                                                                                                          | dipole-dipole, $n_0 \rightarrow \sigma_{C,O}^*$ , $E_p \approx -1.7$     | 9.2                                                                                   | B3LYP                            | 1,2           |  |
|                                |                  |                                                                                                                                                                                                                                   | [O-CH <sub>2</sub> -CH <sub>2</sub> -]                                                    | ttt, tgt                                                                                                    | C-H...O, $E_p \approx -1.5$ to $+0.1$                                    | 5.1 (40 °C)                                                                           | MP2                              | 2-4           |  |
|                                |                  |                                                                                                                                                                                                                                   | [O-CH <sub>2</sub> -CH <sub>2</sub> -CH <sub>2</sub> -]                                   | tggt                                                                                                        | $E_p \approx -0.7$                                                       | 3.7                                                                                   | MP2                              | 5             |  |
|                                |                  |                                                                                                                                                                                                                                   | [O-CH <sub>2</sub> -CH(CH <sub>3</sub> )-]                                                | tg <sup>+</sup> g <sup>+</sup> [(R) form], ttt                                                              | C-H...O                                                                  | 5.9 (isotactic, 50 °C)                                                                | MP2                              | 2,6-8         |  |
| Polyamine                      | C, H, N          | poly(ethylene imine)<br>poly(trimethylene imine)                                                                                                                                                                                  | [O-CH <sub>2</sub> -CH <sub>2</sub> -CH <sub>2</sub> -]                                   | tggt                                                                                                        | C-H...O, $E_p \approx -0.6$                                              | 5.7 (30 °C)                                                                           | MP2                              | 9,10          |  |
|                                |                  |                                                                                                                                                                                                                                   | [NH-CH <sub>2</sub> -CH <sub>2</sub> -]                                                   | tgt [meso]                                                                                                  | N-H...N                                                                  | 3.1                                                                                   | MP2                              | 11,12         |  |
| Polyphosphine                  | C, H, P          | poly(1-methylphosphirane)<br>poly(1-phenylphosphirane)                                                                                                                                                                            | [NH-CH <sub>2</sub> -CH <sub>2</sub> -CH <sub>2</sub> -]                                  | tg <sup>+</sup> g <sup>+</sup> t [racemo]                                                                   | N-H...N                                                                  | 3.5                                                                                   | MP2                              | 13            |  |
|                                |                  |                                                                                                                                                                                                                                   | [P(CH <sub>3</sub> )-CH <sub>2</sub> -CH <sub>2</sub> -]                                  | ttt [meso]                                                                                                  | $\pi - \pi$                                                              | 7.0 [atactic]                                                                         | MP2                              | 14            |  |
| Polysulfide (Polythioether)    | C, H, S          | poly(methylene sulfide)<br>poly(ethylene sulfide)<br>poly(trimethylene sulfide)<br>poly(propylene sulfide)                                                                                                                        | [P(CH <sub>3</sub> )-CH <sub>2</sub> -CH <sub>2</sub> -]                                  | ttt [racemo]                                                                                                | $\pi - \pi$                                                              | 13.0 [atactic]                                                                        | MP2                              | 14            |  |
|                                |                  |                                                                                                                                                                                                                                   | [S-CH <sub>2</sub> -]                                                                     | gg                                                                                                          | dipole-dipole, $n_s \rightarrow \sigma_{C,S}^*$ , $E_p \approx -1.5$     | 7.6                                                                                   | B3LYP                            | 1,2           |  |
|                                |                  |                                                                                                                                                                                                                                   | [S-CH <sub>2</sub> -CH <sub>2</sub> -]                                                    | g <sup>+</sup> tg <sup>+</sup>                                                                              | dipole-dipole, $E_p \approx -0.4$ , [S...S]                              | 3.1                                                                                   | MP2                              | 2,3           |  |
|                                |                  |                                                                                                                                                                                                                                   | [S-CH <sub>2</sub> -CH <sub>2</sub> -CH <sub>2</sub> -]                                   | gggg                                                                                                        | $E_p \approx -0.2$ , $E_p \approx -0.3$                                  | 3.6                                                                                   | MP2                              | 5             |  |
| Polyselenide (Polyselenoether) | C, H, Se         | poly(methylene selenide)<br>poly(ethylene selenide)<br>poly(trimethylene selenide)                                                                                                                                                | [S-CH <sub>2</sub> -CH(CH <sub>3</sub> )-]                                                | g <sup>+</sup> tg <sup>+</sup> [(R) form]                                                                   | $E_p \approx -0.5$                                                       | 4.0 (isotactic)                                                                       | MP2                              | 2,15          |  |
|                                |                  |                                                                                                                                                                                                                                   | [Se-CH <sub>2</sub> -]                                                                    | gg                                                                                                          | dipole-dipole, $n_{se} \rightarrow \sigma_{C,Se}^*$ , $E_p \approx -1.2$ | 7.3                                                                                   | MP2                              | 16            |  |
|                                |                  |                                                                                                                                                                                                                                   | [Se-CH <sub>2</sub> -CH <sub>2</sub> -]                                                   | g <sup>+</sup> tg <sup>+</sup>                                                                              | $E_p \approx -0.3$ , [Se...Se]                                           | 5.4                                                                                   | MP2                              | 16            |  |
|                                |                  |                                                                                                                                                                                                                                   | [Se-CH <sub>2</sub> -CH <sub>2</sub> -CH <sub>2</sub> -]                                  | g <sup>+</sup> tg <sup>+</sup>                                                                              | $E_p \approx -0.4$                                                       | 5.3                                                                                   | MP2                              | 16            |  |
| Copolymer                      | C, H, N, O       | poly(ethylene imine- <i>alt</i> -ethylene oxide)<br>poly(ethylene imine- <i>alt</i> -ethylene sulfide)<br>poly(ethylene oxide- <i>alt</i> -ethylene sulfide)                                                                      | [NH-CH <sub>2</sub> -CH <sub>2</sub> -O-CH <sub>2</sub> -CH <sub>2</sub> -]               | tg <sup>-</sup> t [form] in N-C-C-O                                                                         | N-H...O, C-H...N, C-H...O                                                | 1.3                                                                                   | MP2                              | 12,17         |  |
|                                |                  |                                                                                                                                                                                                                                   | [NH-CH <sub>2</sub> -CH <sub>2</sub> -S-CH <sub>2</sub> -CH <sub>2</sub> -]               | tg <sup>+</sup> g <sup>+</sup> [form] in N-C-C-S                                                            | N-H...S, $E_p(CS) = -0.4$                                                | 5.2                                                                                   | MP2                              | 12            |  |
|                                |                  |                                                                                                                                                                                                                                   | [O-CH <sub>2</sub> -CH <sub>2</sub> -S-CH <sub>2</sub> -CH <sub>2</sub> -]                | ttg in O-C-C-S                                                                                              | C-H...O, dipole-dipole, $E_p(CS) = -0.4$                                 | 6.0                                                                                   | MP2                              | 18            |  |
| Polyester                      | C, H, O          | poly(ethylene terephthalate)<br>poly(trimethylene terephthalate)<br>poly(butylene terephthalate)<br>poly(ethylene naphthalate)<br>poly(L-lactide), poly(D)-lactic acid<br>poly((R)-3-hydroxybutyrate)<br>poly(ethylene succinate) | [CO <sub>2</sub> C <sub>6</sub> H <sub>4</sub> COO-(CH <sub>2</sub> ) <sub>2</sub> -O-]   | trans-tgt <sup>d</sup>                                                                                      | C-H...O, dipole-dipole, $E_p \approx -1.2$                               | 2.6 <sup>e</sup>                                                                      | MP2                              | 19            |  |
|                                |                  |                                                                                                                                                                                                                                   | [CO <sub>2</sub> C <sub>6</sub> H <sub>4</sub> COO-(CH <sub>2</sub> ) <sub>3</sub> -O-]   | trans-tggt, tggg <sup>d</sup>                                                                               | $\pi - \pi$ , C-H...O, dipole-dipole, $E_p \approx -0.6$                 | 4.1 <sup>e</sup>                                                                      | MP2, MP3 <sup>f</sup>            | 20,21         |  |
|                                |                  |                                                                                                                                                                                                                                   | [CO <sub>2</sub> C <sub>6</sub> H <sub>4</sub> COO-(CH <sub>2</sub> ) <sub>4</sub> -O-]   | trans-tgtgt, tgggg, tg <sup>+</sup> tg <sup>+</sup> t <sup>d</sup>                                          | $\pi - \pi$ , C-H...O, dipole-dipole, $E_p \approx -0.3$                 | 3.8 <sup>e</sup>                                                                      | MP2, MP3 <sup>f</sup>            | 21            |  |
|                                |                  |                                                                                                                                                                                                                                   | [CO <sub>2</sub> C <sub>10</sub> H <sub>6</sub> COO-(CH <sub>2</sub> ) <sub>2</sub> -O-]  | gt                                                                                                          | C-H...O, dipole-dipole, $E_p \approx -1.2$                               | 2.4 <sup>e</sup>                                                                      | MP2                              | 19            |  |
|                                |                  |                                                                                                                                                                                                                                   | [CO-O-CH(CH <sub>3</sub> )-]                                                              | tg <sup>+</sup> t                                                                                           | O...H, [O...O]                                                           | 11.8                                                                                  | MP2 or B3LYP <sup>g</sup>        | 22            |  |
|                                |                  |                                                                                                                                                                                                                                   | [CO-O-CH(CH <sub>3</sub> )-CH <sub>2</sub> -]                                             | ttg <sup>+</sup> g <sup>+</sup>                                                                             | O...H                                                                    | 5.6                                                                                   | MP2                              | 23            |  |
|                                |                  |                                                                                                                                                                                                                                   | [COO-(CH <sub>2</sub> ) <sub>2</sub> -O-]                                                 | tgt                                                                                                         | $E_p \approx -1.3$                                                       | 6.2                                                                                   | MP2, M06-2X                      | 24            |  |
|                                |                  |                                                                                                                                                                                                                                   | [COO-(CH <sub>2</sub> ) <sub>4</sub> -O-]                                                 | ttt                                                                                                         | $E_p \approx -0.2$                                                       | 7.1                                                                                   | MP2, M06-2X                      | 24            |  |
|                                |                  |                                                                                                                                                                                                                                   | [COO-(CH <sub>2</sub> ) <sub>2</sub> -CH <sub>2</sub> -]                                  | tg <sup>+</sup> tg <sup>+</sup> t                                                                           |                                                                          |                                                                                       |                                  |               |  |
|                                |                  |                                                                                                                                                                                                                                   | [COO-(CH <sub>2</sub> ) <sub>3</sub> -NH-]                                                | ttt                                                                                                         |                                                                          |                                                                                       |                                  |               |  |
| Polyamide                      | C, H, N          | aromatic polyamide 2T<br>aromatic polyamide 3T                                                                                                                                                                                    | [CO <sub>2</sub> C <sub>6</sub> H <sub>4</sub> CONH-(CH <sub>2</sub> ) <sub>2</sub> -NH-] | cis-trans-tg <sup>+</sup> g <sup>+</sup> t <sup>d</sup>                                                     | N-H...O                                                                  | 3.2 <sup>e</sup>                                                                      | B3LYP                            | 25            |  |
|                                |                  |                                                                                                                                                                                                                                   | [CO <sub>2</sub> C <sub>6</sub> H <sub>4</sub> CONH-(CH <sub>2</sub> ) <sub>3</sub> -NH-] | cis-trans-ttg <sup>d</sup>                                                                                  | C-H...O                                                                  | 3.7 <sup>e</sup>                                                                      | B3LYP                            | 25            |  |
| Polythioester                  | C, H, O, S       | poly(ethylene dithioester)<br>poly(trimethylene dithioester)                                                                                                                                                                      | [CO <sub>2</sub> C <sub>6</sub> H <sub>4</sub> COS-(CH <sub>2</sub> ) <sub>2</sub> -S-]   | trans-g <sup>+</sup> tg <sup>+</sup> t <sup>d</sup>                                                         | dipole-dipole, $E_p \approx -1.5$ , [S...S]                              | 16.7 <sup>e</sup>                                                                     | MP2                              | 25-28         |  |
|                                |                  |                                                                                                                                                                                                                                   | [CO <sub>2</sub> C <sub>6</sub> H <sub>4</sub> COS-(CH <sub>2</sub> ) <sub>3</sub> -S-]   | trans-gtgg <sup>d</sup>                                                                                     | dipole-dipole, $E_p \approx -1.0$ to $-1.4$                              | 10.5 <sup>e</sup>                                                                     | MP2                              | 25,27,28      |  |
| Polythioamide                  | C, H, N, S       | aromatic polythioamide 2T<br>aromatic polythioamide 3T                                                                                                                                                                            | [CSC <sub>6</sub> H <sub>4</sub> CSSNH-(CH <sub>2</sub> ) <sub>2</sub> -NH-]              | cis-trans-tg <sup>+</sup> g <sup>+</sup> t <sup>d</sup> , g <sup>+</sup> tg <sup>+</sup> , ggg <sup>d</sup> | N-H...S                                                                  | 3.6 <sup>e</sup>                                                                      | B3LYP                            | 25            |  |
|                                |                  |                                                                                                                                                                                                                                   | [CSC <sub>6</sub> H <sub>4</sub> CSSNH-(CH <sub>2</sub> ) <sub>3</sub> -NH-]              | cis-trans-tttt <sup>d</sup>                                                                                 |                                                                          | 5.7 <sup>e</sup>                                                                      | B3LYP                            | 25            |  |
| Polydithioester                | C, H, S          | poly(ethylene tetrahydroester)<br>poly(trimethylene tetrahydroester)                                                                                                                                                              | [CSC <sub>6</sub> H <sub>4</sub> CSS-(CH <sub>2</sub> ) <sub>2</sub> -S-]                 | trans-cis-g <sup>+</sup> tg <sup>+</sup> t <sup>d</sup>                                                     | dipole-dipole, $E_p \approx -1.0$ , [S...S]                              | 5.2 <sup>e</sup>                                                                      | MP2                              | 25-28         |  |
|                                |                  |                                                                                                                                                                                                                                   | [CSC <sub>6</sub> H <sub>4</sub> CSS-(CH <sub>2</sub> ) <sub>3</sub> -S-]                 | trans-cis-gtgg <sup>d</sup>                                                                                 | dipole-dipole, $E_p \approx -0.8$                                        | 6.1 <sup>e</sup>                                                                      | MP2                              | 25,27,28      |  |
| Polysilane                     | C, H, Si         | poly(methyl- <i>n</i> -propylsilane)<br>poly(di- <i>n</i> -butylsilane)<br>poly(di- <i>n</i> -hexylsilane)                                                                                                                        | [Si(CH <sub>3</sub> )(C <sub>3</sub> H <sub>7</sub> )-]                                   | [repulsion between the side chains]<br>[as above]                                                           | 19.9                                                                     | (MD) <sup>h</sup>                                                                     | 29,30                            |               |  |
|                                |                  |                                                                                                                                                                                                                                   | [Si(C <sub>4</sub> H <sub>9</sub> ) <sub>2</sub> -]                                       | [as above]                                                                                                  | 42.3 (19.1 °C)                                                           | (MD) <sup>h</sup>                                                                     | 29,30                            |               |  |
|                                |                  |                                                                                                                                                                                                                                   | [Si(C <sub>6</sub> H <sub>13</sub> ) <sub>2</sub> -]                                      | [as above]                                                                                                  | 42.5                                                                     | (MD) <sup>h</sup>                                                                     | 29,30                            |               |  |

<sup>a</sup> Attractive interactions are mainly specified, and repulsions are written in the square brackets.  $E_p$  and  $E_o$  are conformational energies (in kcal mol<sup>-1</sup>) of the gauche states in C-X and XC-C bonds (X: heteroatom), respectively. The designations are not necessarily consistent with those in the original papers. <sup>b</sup> At 25 °C when the temperature is not indicated. <sup>c</sup> Abbreviations: B3LYP, Becke's three parameter hybrid functional with the correlation functional of Lee, Yang, and Parr; <sup>31</sup> MP2 or MP3, a Hartree-Fock calculation followed by the Miller-Plesset correlation energy correction truncated at second-order (MP2) or third order (MP3); <sup>32</sup> M06-2X, the hybrid functional of Zhao and Truhlar. <sup>33</sup> *d* Trans and cis represent the relative orientations between two carbonyl or thiocarbonyl groups bonded to the benzene ring. <sup>e</sup> The virtual bond was used to represent the benzene or naphthalene ring. <sup>f</sup> The extrapolation to the complete basis set <sup>34,35</sup> and the compensation for the higher-order correlations <sup>36,37</sup> are required for proper evaluation of  $\pi - \pi$  interaction energies of these aromatic polyesters. <sup>g</sup> The MP2 energies reproduced NMR experiments on the model compounds better than the B3LYP ones, whereas the latter energies yielded better agreement with experimental configurational properties of poly(L-lactide) and poly(DL-lactide). <sup>h</sup> By the rotational isomeric state (RIS) scheme with molecular dynamic simulations.

**Table S2** Observed vicinal  $^1\text{H}$ – $^1\text{H}$  and  $^{13}\text{C}$ – $^1\text{H}$  coupling constants of EA-1 and EA-1– $^{13}\text{C}$  <sup>a</sup>

| Solvent <sup>b</sup>       | Temp (°C) | $J_{\text{CH}}^{\text{O}}$ | $J_{\text{HH}}$ | $J'_{\text{HH}}$ | $J_{\text{CH}}^{\text{N}}$ | $J_{\text{HH}}^{\text{N}}$ |
|----------------------------|-----------|----------------------------|-----------------|------------------|----------------------------|----------------------------|
| $\text{C}_6\text{D}_6$     | 15        | 3.33                       | 6.66            | 4.72             | 3.50                       | 5.85                       |
|                            | 25        | 3.33                       | 6.66            | 4.72             | 3.50                       | 5.85                       |
|                            | 35        | 3.35                       | 6.60            | 4.72             | 3.50                       | 5.85                       |
|                            | 45        | 3.36                       | 6.60            | 4.78             | 3.50                       | 5.85                       |
|                            | 55        | 3.38                       | 6.60            | 4.79             | 3.50                       | 5.85                       |
| $\text{CDCl}_3$            | 15        | 3.12                       | 6.79            | 3.87             | 3.32                       | 5.74                       |
|                            | 25        | 3.18                       | 6.78            | 3.90             | 3.32                       | 5.74                       |
|                            | 35        | 3.19                       | 6.78            | 3.93             | 3.32                       | 5.74                       |
|                            | 45        | 3.24                       | 6.78            | 3.98             | 3.31                       | 5.74                       |
|                            | 55        | 3.27                       | 6.75            | 4.02             | 3.31                       | 5.74                       |
| $(\text{CD}_3)_2\text{SO}$ | 25        | 3.19                       | 6.52            | 4.96             | 3.76                       | 5.70                       |
|                            | 35        | 3.20                       | 6.52            | 5.02             | 3.76                       | 5.70                       |
|                            | 45        | 3.24                       | 6.52            | 5.08             | 3.76                       | 5.70                       |
|                            | 55        | 3.25                       | 6.48            | 5.14             | 3.76                       | 5.72                       |
| $\text{D}_2\text{O}$       | 15        | 3.10                       | 6.77            | 3.80             | 3.80                       | – <sup>c</sup>             |
|                            | 25        | 3.13                       | 6.76            | 3.80             | 3.80                       | –                          |
|                            | 35        | 3.15                       | 6.75            | 3.91             | 3.80                       | –                          |
|                            | 45        | 3.17                       | 6.74            | 3.95             | 3.78                       | –                          |
|                            | 55        | 3.17                       | 6.74            | 3.97             | 3.78                       | –                          |

<sup>a</sup>In Hz. <sup>b</sup> Symbols:  $\text{C}_6\text{D}_6$ , benzene-*d*<sub>6</sub>;  $\text{CDCl}_3$ , chloroform-*d*;  $(\text{CD}_3)_2\text{SO}$ , dimethyl-*d*<sub>6</sub> sulfoxide (abbreviated as DMSO-*d*<sub>6</sub>);  $\text{D}_2\text{O}$ , deuterium oxide (water-*d*<sub>2</sub>). <sup>c</sup> Not available.

**Table S3** Trans fractions of the O–C, C–C, and C–N bonds of EA-1, determined from NMR experiments

|                                    |           | Bond <sup>a</sup>          |                    |                                      |                    |                            |                    |                            |                    |
|------------------------------------|-----------|----------------------------|--------------------|--------------------------------------|--------------------|----------------------------|--------------------|----------------------------|--------------------|
|                                    |           | b: O–C                     |                    | c: C–C                               |                    | d: C–N                     |                    |                            |                    |
|                                    |           | $J_{\text{CH}}^{\text{O}}$ |                    | $J_{\text{HH}}$ and $J'_{\text{HH}}$ |                    | $J_{\text{CH}}^{\text{N}}$ |                    | $J_{\text{HH}}^{\text{N}}$ |                    |
| Solvent                            | Temp (°C) | Set A <sup>b</sup>         | Set B <sup>c</sup> | Set C <sup>d</sup>                   | Set D <sup>e</sup> | Set E <sup>f</sup>         | Set F <sup>g</sup> | Set G <sup>h</sup>         | Set H <sup>i</sup> |
| C <sub>6</sub> D <sub>6</sub>      | 15        | 0.40                       | 0.42               | 0.14                                 | 0.22               | 0.10                       | 0.16               | 0.10                       | 0.11               |
|                                    | 25        | 0.40                       | 0.42               | 0.14                                 | 0.22               | 0.10                       | 0.16               | 0.10                       | 0.11               |
|                                    | 35        | 0.40                       | 0.42               | 0.14                                 | 0.23               | 0.10                       | 0.16               | 0.10                       | 0.11               |
|                                    | 45        | 0.40                       | 0.41               | 0.15                                 | 0.23               | 0.10                       | 0.16               | 0.10                       | 0.11               |
|                                    | 55        | 0.39                       | 0.41               | 0.15                                 | 0.23               | 0.10                       | 0.16               | 0.10                       | 0.11               |
| CDCl <sub>3</sub>                  | 15        | 0.46                       | 0.48               | 0.07                                 | 0.14               | 0.16                       | 0.22               | 0.15                       | 0.14               |
|                                    | 25        | 0.45                       | 0.46               | 0.07                                 | 0.15               | 0.16                       | 0.22               | 0.15                       | 0.14               |
|                                    | 35        | 0.44                       | 0.46               | 0.07                                 | 0.15               | 0.16                       | 0.22               | 0.15                       | 0.14               |
|                                    | 45        | 0.43                       | 0.45               | 0.08                                 | 0.15               | 0.17                       | 0.22               | 0.15                       | 0.14               |
|                                    | 55        | 0.42                       | 0.44               | 0.08                                 | 0.16               | 0.17                       | 0.22               | 0.15                       | 0.14               |
| (CD <sub>3</sub> ) <sub>2</sub> SO | 25        | 0.44                       | 0.46               | 0.17                                 | 0.25               | 0.01                       | 0.08               | 0.17                       | 0.15               |
|                                    | 35        | 0.44                       | 0.46               | 0.17                                 | 0.26               | 0.01                       | 0.08               | 0.17                       | 0.15               |
|                                    | 45        | 0.43                       | 0.45               | 0.18                                 | 0.27               | 0.01                       | 0.08               | 0.17                       | 0.15               |
|                                    | 55        | 0.43                       | 0.44               | 0.19                                 | 0.27               | 0.01                       | 0.08               | 0.16                       | 0.14               |
| D <sub>2</sub> O                   | 15        | 0.47                       | 0.48               | 0.06                                 | 0.14               | 0.00                       | 0.07               | – <sup>j</sup>             | – <sup>j</sup>     |
|                                    | 25        | 0.46                       | 0.47               | 0.07                                 | 0.14               | 0.00                       | 0.07               | –                          | –                  |
|                                    | 35        | 0.45                       | 0.47               | 0.07                                 | 0.15               | 0.00                       | 0.07               | –                          | –                  |
|                                    | 45        | 0.45                       | 0.46               | 0.08                                 | 0.15               | 0.00                       | 0.07               | –                          | –                  |
|                                    | 55        | 0.45                       | 0.46               | 0.08                                 | 0.15               | 0.00                       | 0.07               | –                          | –                  |

<sup>a</sup> See Fig. 2a. <sup>b</sup> With the coupling constants calculated from a Karplus equation proposed by Tvaroška and Gajdoš:<sup>38</sup>  $J_{\text{G}_1} + J_{\text{G}_2} = 2.42$  Hz and  $J'_{\text{T}} + J'_{\text{G}} = 9.53$  Hz. <sup>c</sup> With the coupling constants calculated from MO calculations at the B3LYP/6-311++G(3df,3pd) level:  $J_{\text{G}_1} + J_{\text{G}_2} = 2.26$  Hz and  $J'_{\text{T}} + J'_{\text{G}} = 9.87$  Hz. <sup>d</sup> With the coupling constants of 2-methylmorpholine: e.g.,  $J_{\text{T}} = 11.62$ ,  $J_{\text{G}} = 2.35$ ,  $J'_{\text{T}} = 11.62$ ,  $J'_{\text{G}} = 3.33$ ,  $J''_{\text{G}} = 1.21$ , and  $J'''_{\text{G}} = 2.51$  Hz for the chloroform solution. For the details, see reference<sup>17</sup>. <sup>e</sup> With the coupling constants calculated from MO calculations at the B3LYP/6-311++G(3df,3pd) level:  $J_{\text{T}} = 11.12$ ,  $J_{\text{G}} = 4.82$ ,  $J'_{\text{T}} = 10.07$ ,  $J'_{\text{G}} = 2.25$ ,  $J''_{\text{G}} = 1.96$ , and  $J'''_{\text{G}} = 1.82$  Hz. <sup>f</sup> With the coupling constants calculated from a Karplus equation proposed by Kao and Barfield:<sup>39</sup>  $J_{\text{G}_1} + J_{\text{G}_2} = 1.96$  Hz and  $J'_{\text{T}} + J'_{\text{G}} = 7.56$  Hz. <sup>g</sup> With the coupling constants calculated from MO calculations at the B3LYP/6-311++G(3df,3pd) level:  $J_{\text{G}_1} + J_{\text{G}_2} = 1.57$  Hz and  $J'_{\text{T}} + J'_{\text{G}} = 8.03$  Hz. <sup>h</sup> With the coupling constants calculated from a Karplus equation proposed by Ludvigsen *et al.*:<sup>40</sup>  $J_{\text{C}_1} + J_{\text{C}_2} = 8.13$  Hz and  $J'_{\text{E}} + J'_{\text{C}} = 12.09$  Hz. <sup>i</sup> With the coupling constants calculated from MO calculations at the B3LYP/6-311++G(3df,3pd) level:  $J_{\text{C}_1} + J_{\text{C}_2} = 5.16$  Hz and  $J'_{\text{E}} + J'_{\text{C}} = 12.48$  Hz. <sup>j</sup> Not available.

**Table S4** Trans fractions of the O–C, C–C, and C–N bonds of EA-1, evaluated from MO calculations

| Solvent    | Solvation model | Temp (°C) | Bond <sup>a</sup>  |                     |                  |                    |                     |                  |                    |                     |                  |      |
|------------|-----------------|-----------|--------------------|---------------------|------------------|--------------------|---------------------|------------------|--------------------|---------------------|------------------|------|
|            |                 |           | b: O–C             |                     |                  | c: C–C             |                     |                  | d: C–N             |                     |                  |      |
|            |                 |           | B3LYP <sup>b</sup> | M06-2X <sup>c</sup> | MP2 <sup>d</sup> | B3LYP <sup>b</sup> | M06-2X <sup>c</sup> | MP2 <sup>d</sup> | B3LYP <sup>b</sup> | M06-2X <sup>c</sup> | MP2 <sup>d</sup> |      |
| Benzene    | IEFPCM          | 15        |                    | 0.34                | 0.37             |                    | 0.13                | 0.11             |                    | 0.19                | 0.17             |      |
|            |                 | 25        |                    | 0.34                | 0.37             |                    | 0.14                | 0.11             |                    | 0.20                | 0.17             |      |
|            |                 | 35        |                    | 0.34                | 0.37             |                    | 0.14                | 0.12             |                    | 0.20                | 0.17             |      |
|            |                 | 45        |                    | 0.34                | 0.37             |                    | 0.15                | 0.12             |                    | 0.20                | 0.17             |      |
|            |                 | 55        |                    | 0.34                | 0.37             |                    | 0.15                | 0.13             |                    | 0.20                | 0.18             |      |
| Chloroform | IEFPCM          | 15        | 0.66               | 0.39                | 0.41             | 0.19               | 0.16                | 0.13             | 0.07               | 0.13                | 0.12             |      |
|            |                 | 25        | 0.65               | 0.39                | 0.41             | 0.19               | 0.16                | 0.14             | 0.08               | 0.14                | 0.12             |      |
|            |                 | 35        | 0.64               | 0.39                | 0.41             | 0.20               | 0.17                | 0.14             | 0.08               | 0.14                | 0.13             |      |
|            |                 | 45        | 0.63               | 0.39                | 0.41             | 0.20               | 0.17                | 0.15             | 0.08               | 0.14                | 0.13             |      |
|            |                 | 55        | 0.63               | 0.39                | 0.40             | 0.21               | 0.18                | 0.15             | 0.09               | 0.14                | 0.13             |      |
|            | CPCM            | 15        | 0.66               | 0.40                | 0.41             | 0.20               | 0.16                | 0.14             | 0.06               | 0.11                | 0.10             |      |
|            |                 | 25        | 0.66               | 0.40                | 0.41             | 0.20               | 0.17                | 0.14             | 0.06               | 0.11                | 0.10             |      |
|            |                 | 35        | 0.65               | 0.40                | 0.41             | 0.21               | 0.17                | 0.15             | 0.07               | 0.11                | 0.11             |      |
|            |                 | 45        | 0.64               | 0.40                | 0.41             | 0.21               | 0.18                | 0.15             | 0.07               | 0.12                | 0.11             |      |
|            |                 | 55        | 0.64               | 0.40                | 0.41             | 0.22               | 0.18                | 0.16             | 0.07               | 0.12                | 0.11             |      |
| DMSO       | IEFPCM          | 25        | 0.70               | 0.45                | 0.45             | 0.24               | 0.20                | 0.17             | 0.04               | 0.08                | 0.08             |      |
|            |                 | 35        | 0.70               | 0.45                | 0.45             | 0.24               | 0.21                | 0.17             | 0.05               | 0.08                | 0.08             |      |
|            |                 | 45        | 0.69               | 0.45                | 0.45             | 0.25               | 0.21                | 0.18             | 0.05               | 0.08                | 0.08             |      |
|            |                 | 55        | 0.68               | 0.44                | 0.45             | 0.25               | 0.21                | 0.18             | 0.05               | 0.09                | 0.08             |      |
|            |                 | CPCM      | 25                 | 0.70                | 0.45             | 0.45               | 0.24                | 0.20             | 0.17               | 0.04                | 0.08             | 0.07 |
|            | 35              |           | 0.70               | 0.45                | 0.45             | 0.25               | 0.21                | 0.17             | 0.04               | 0.08                | 0.08             |      |
|            | 45              |           | 0.69               | 0.45                | 0.45             | 0.25               | 0.21                | 0.18             | 0.05               | 0.08                | 0.08             |      |
|            | 55              |           | 0.68               | 0.45                | 0.45             | 0.25               | 0.21                | 0.18             | 0.05               | 0.08                | 0.08             |      |
|            | Water           |           | IEFPCM             | 15                  |                  | 0.45               | 0.45                |                  | 0.20               | 0.17                |                  | 0.07 |
|            |                 | 25        |                    |                     | 0.45             | 0.45               |                     | 0.20             | 0.17               |                     | 0.08             | 0.07 |
| 35         |                 |           |                    | 0.45                | 0.45             |                    | 0.21                | 0.17             |                    | 0.08                | 0.08             |      |
| 45         |                 |           |                    | 0.45                | 0.45             |                    | 0.21                | 0.18             |                    | 0.08                | 0.08             |      |
| 55         |                 |           |                    | 0.45                | 0.45             |                    | 0.22                | 0.18             |                    | 0.08                | 0.08             |      |

<sup>a</sup> See Fig. 2a. <sup>b</sup> At the B3LYP/6-311+G(2d,p)//B3LYP/6-311+G(2d,p) level. <sup>c</sup> At the M06-2X/6-311+G(2d,p)//B3LYP/6-311+G(2d,p) level. <sup>d</sup> At the MP2/6-311+G(2d,p)//B3LYP/6-311+G(2d,p) level.

**Table S5** Observed vicinal  $^1\text{H}$ - $^1\text{H}$  coupling constants of U-1 and U-2 <sup>a</sup>

| Solvent                            | Temp (°C) | U-1                        |                 |                  | U-2             |                  |
|------------------------------------|-----------|----------------------------|-----------------|------------------|-----------------|------------------|
|                                    |           | $J_{\text{HH}}^{\text{N}}$ | $J_{\text{HH}}$ | $J'_{\text{HH}}$ | $J_{\text{HH}}$ | $J'_{\text{HH}}$ |
| CD <sub>3</sub> OD                 | 15        | – <sup>b</sup>             | 6.89            | 5.34             | 6.49            | 2.92             |
|                                    | 25        | –                          | 6.89            | 5.41             | 6.44            | 2.95             |
|                                    | 35        | –                          | 6.87            | 5.47             | – <sup>b</sup>  | – <sup>b</sup>   |
|                                    | 45        | –                          | 6.81            | 5.54             | –               | –                |
|                                    | 55        | –                          | 6.74            | 5.59             | –               | –                |
| (CD <sub>3</sub> ) <sub>2</sub> SO | 25        | 5.81                       | 7.20            | 5.39             | 6.65            | 2.61             |
|                                    | 35        | 5.76                       | 7.15            | 5.40             | – <sup>b</sup>  | – <sup>b</sup>   |
|                                    | 45        | 5.70                       | 7.14            | 5.51             | –               | –                |
|                                    | 55        | 5.70                       | 7.02            | 5.57             | –               | –                |

<sup>a</sup> In Hz. <sup>b</sup> The satellite of U-2 was broadened at temperatures above 25 °C.

**Table S6** Trans fractions ( $p_t$ 's) of U-1 and U-2: Comparison between NMR experiments and MO calculations

| Medium   | Temp (°C) | U-1 <sup>a</sup>   |                    |                    |                    | U-2 <sup>a</sup> |                    |                    |                |                |      |
|----------|-----------|--------------------|--------------------|--------------------|--------------------|------------------|--------------------|--------------------|----------------|----------------|------|
|          |           | c & e: N–C         |                    | d: C–C             |                    | h & j: O–C       | i: C–C             |                    |                |                |      |
|          |           | NMR                | MO <sup>b</sup>    | NMR                | MO <sup>b</sup>    | MO <sup>b</sup>  | NMR                | MO <sup>b</sup>    |                |                |      |
|          |           | Set A <sup>c</sup> | Set B <sup>d</sup> | Set C <sup>e</sup> | Set D <sup>f</sup> |                  | Set E <sup>g</sup> | Set F <sup>h</sup> |                |                |      |
| Gas      | 15        |                    | 0.16               |                    | 0.13               |                  | 0.47               |                    |                | 0.24           |      |
|          | 25        |                    | 0.16               |                    | 0.14               |                  | 0.46               |                    |                | 0.24           |      |
|          | 35        |                    | 0.16               |                    | 0.14               |                  | 0.46               |                    |                | 0.25           |      |
|          | 45        |                    | 0.17               |                    | 0.14               |                  | 0.46               |                    |                | 0.25           |      |
|          | 55        |                    | 0.17               |                    | 0.14               |                  | 0.45               |                    |                | 0.25           |      |
| Methanol | 15        |                    | 0.19               | 0.18               | 0.23               | 0.14             | 0.65               | 0.07               | 0.15           | 0.12           |      |
|          | 25        |                    | 0.19               | 0.19               | 0.24               | 0.15             | 0.64               | 0.08               | 0.15           | 0.13           |      |
|          | 35        |                    | 0.19               | 0.19               | 0.24               | 0.15             | 0.63               | – <sup>j</sup>     | – <sup>j</sup> | 0.14           |      |
|          | 45        |                    | 0.19               | 0.20               | 0.25               | 0.16             | 0.62               | –                  | –              | 0.14           |      |
|          | 55        |                    | 0.19               | 0.21               | 0.26               | 0.16             | 0.62               | –                  | –              | 0.15           |      |
| DMSO     | 25        | 0.18               | 0.17               | 0.19               | 0.18               | 0.21             | 0.15               | 0.64               | 0.04           | 0.11           | 0.13 |
|          | 35        | 0.21               | 0.18               | 0.19               | 0.18               | 0.22             | 0.15               | 0.63               | – <sup>j</sup> | – <sup>j</sup> | 0.13 |
|          | 45        | 0.23               | 0.20               | 0.19               | 0.19               | 0.23             | 0.16               | 0.63               | –              | –              | 0.14 |
|          | 55        | 0.23               | 0.20               | 0.19               | 0.20               | 0.24             | 0.16               | 0.62               | –              | –              | 0.14 |

<sup>a</sup> For the bond symbols, see Figs. 2c and 2d. <sup>b</sup> At the MP2/6-311+G(2d,p)//B3LYP/6-311+G(2d,p) level with the IEFPCM solvation model. <sup>c</sup> With the coupling constants calculated from a Karplus equation proposed by Ludvigsen *et al.*:<sup>40</sup>  $J_{C_1} + J_{C_2} = 7.98$  Hz and  $J'_E + J'_C = 12.44$  Hz. <sup>d</sup> With the coupling constants calculated from MO calculations at the B3LYP/6-311++G(3df,3pd) level:  $J_{C_1} + J_{C_2} = 4.77$  Hz and  $J'_E + J'_C = 13.03$  Hz. <sup>e</sup> With the coupling constants of 2-methylpiperazine:<sup>11</sup>  $J_T = 11.92$ ,  $J_G = 2.77$ ,  $J'_T = 11.92$ ,  $J'_G = 3.19$ , and  $J''_G = 1.92$  Hz for the methanol solution;  $J_T = 11.49$ ,  $J_G = 2.74$ ,  $J'_T = 11.49$ ,  $J'_G = 3.05$ , and  $J''_G = 2.14$  Hz for the DMSO solution. <sup>f</sup> With the coupling constants calculated from MO calculations at the B3LYP/6-311++G(3df,3pd) level:  $J_T = 10.33$ ,  $J_G = 4.51$ ,  $J'_T = 10.38$ ,  $J'_G = 2.62$ , and  $J''_G = 1.65$  Hz. <sup>g</sup> With the coupling constants optimized for ethylene oxides:<sup>41</sup>  $J_T = J'_T = 11.4$  Hz and  $J_G = J'_G = J''_G = 2.3$  Hz. <sup>h</sup> With the coupling constants calculated from MO calculations at the B3LYP/6-311++G(3df,3pd) level:  $J_T = 11.33$ ,  $J_G = 4.96$ ,  $J'_T = 10.73$ ,  $J'_G = 1.39$ , and  $J''_G = 2.49$  Hz. <sup>i</sup> Not available.

## References

- 1 M. Sawanobori, Y. Sasanuma and A. Kaito, *Macromolecules*, 2001, **34**, 8321–8329.
- 2 Y. Sasanuma, *Annual Reports on NMR Spectroscopy*, Academic Press (Elsevier Science), Oxford, UK, 2003, vol. 49, ch. 5, pp. 213–280.
- 3 Y. Sasanuma, H. Ohta, I. Touma, H. Matoba, Y. Hayashi and A. Kaito, *Macromolecules*, 2002, **35**, 3748–3761.
- 4 Y. Sasanuma and K. Sugita, *Polym. J.*, 2006, **38**, 983–988.
- 5 Y. Sasanuma and A. Watanabe, *Macromolecules*, 2006, **39**, 1646–1656.
- 6 Y. Sasanuma, *J. Phys. Chem.*, 1994, **98**, 13486–13488.
- 7 Y. Sasanuma, *Macromolecules*, 1995, **28**, 8629–8638.
- 8 Y. Sasanuma, T. Iwata, Y. Kato, H. Kato, T. Yarita, S. Kinugasa and R. V. Law, *J. Phys. Chem. A*, 2001, **105**, 3277–3283.
- 9 R. V. Law and Y. Sasanuma, *J. Chem. Soc., Faraday Trans.*, 1996, **92**, 4885–4888.
- 10 R. V. Law and Y. Sasanuma, *Macromolecules*, 1998, **31**, 2335–2342.
- 11 Y. Sasanuma, S. Hattori, S. Imazu, S. Ikeda, T. Kaizuka, T. Iijima, M. Sawanobori, M. A. Azam, R. V. Law and J. H. G. Steinke, *Macromolecules*, 2004, **37**, 9169–9183.
- 12 Y. Sasanuma and R. Kumagai, *Macromolecules*, 2007, **40**, 7393–7399.
- 13 Y. Sasanuma, F. Teramae, H. Yamashita, I. Hamano and S. Hattori, *Macromolecules*, 2005, **38**, 3519–3532.
- 14 Y. Sasanuma, Y. Ogawa and M. Matsumoto, *Phys. Chem. Chem. Phys.*, 2010, **12**, 14619–14628.
- 15 Y. Sasanuma, Y. Hayashi, H. Matoba, I. Touma, H. Ohta, M. Sawanobori and A. Kaito, *Macromolecules*, 2002, **35**, 8216–8226.
- 16 Y. Sasanuma, A. Watanabe and K. Tamura, *J. Phys. Chem. B*, 2008, **112**, 9613–9624.
- 17 Y. Sasanuma, R. Kumagai and K. Nakata, *Macromolecules*, 2006, **39**, 6752–6764.
- 18 Y. Sasanuma, S. Asai and R. Kumagai, *Macromolecules*, 2007, **40**, 3488–3497.
- 19 Y. Sasanuma, *Macromolecules*, 2009, **42**, 2854–2862.
- 20 Y. Sasanuma and N. Suzuki, *Macromolecules*, 2009, **42**, 7203–7212.
- 21 Y. Sasanuma, Y. Wagai, N. Suzuki and D. Abe, *Polymer*, 2013, **54**, 3904–3913.
- 22 Y. Sasanuma and D. Touge, *Polymer*, 2014, **55**, 1901–1911.
- 23 Y. Sasanuma and S. Katsumata, *Polym. J.*, 2013, **45**, 727–737.
- 24 Y. Sasanuma, Y. Nonaka and Y. Yamaguchi, *Polymer*, 2015, **56**, 327–339.
- 25 M. Nagasawa, T. Ishii, D. Abe and Y. Sasanuma, *RSC Advances*, 2015, **5**, 96611–96622.
- 26 D. Abe and Y. Sasanuma, *Polym. Chem.*, 2012, **3**, 1576–1587.
- 27 D. Abe, Y. Fukuda and Y. Sasanuma, *Polym. Chem.*, 2015, **6**, 3131–3142.
- 28 D. Abe, Y. Fukuda and Y. Sasanuma, *Polym. Chem.*, 2016, **7**, 1682–1682.
- 29 H. Kato, Y. Sasanuma, A. Kaito, N. Tanigaki, Y. Tanabe and S. Kinugasa, *Macromolecules*, 2001, **34**, 262–268.
- 30 Y. Sasanuma, H. Kato and A. Kaito, *J. Phys. Chem. B*, 2003, **107**, 11852–11860.
- 31 A. D. Becke, *J. Chem. Phys.*, 1993, **98**, 5648–5652.
- 32 C. Moller and M. S. Plesset, *Phys. Rev.*, 1934, **46**, 618–622.
- 33 Y. Zhao and D. G. Truhlar, *Acc. Chem. Res.*, 2008, **41**, 157–167.
- 34 T. Helgaker, W. Klopper, H. Koch, and J. Noga, *J. Chem. Phys.*, 1997, **106**, 9639–9646.
- 35 D. G. Truhlar, *Chem. Phys. Lett.*, 1998, **294**, 45–48.
- 36 M. Pitoňák, P. Neogrady, J. Černý, S. Grimme and P. Hobza, *ChemPhysChem*, 2009, **10**, 282–289.
- 37 C. A. Morgado, P. Jurečka, D. Svozil, P. Hobza and J. Šponer, *Phys. Chem. Chem. Phys.*, 2010, **12**, 3522–3534.
- 38 I. Tvaroška and J. Gajdoš, *Carbohydr. Res.*, 1995, **271**, 151–162.
- 39 L.-F. Kao and M. Barfield, *J. Am. Chem. Soc.*, 1985, **107**, 2323–2330.
- 40 S. Ludvigsen, K. V. Andersen and F. M. Poulsen, *J. Mol. Biol.*, 1991, **217**, 731–736.
- 41 K. Tasaki and A. Abe, *Polym. J.*, 1985, **17**, 641–655.
